# Supplementary material for: Integrin α PAT-2/CDC-42 Signaling Is Required for Muscle-Mediated Clearance of Apoptotic Cells in Caenorhabditis elegans
Source: PubMed Central journal article supplement (PMC3355063; doi:10.1371/journal.pgen.1002663), 2012-05-17

Figure S3

PAT-2::GFP

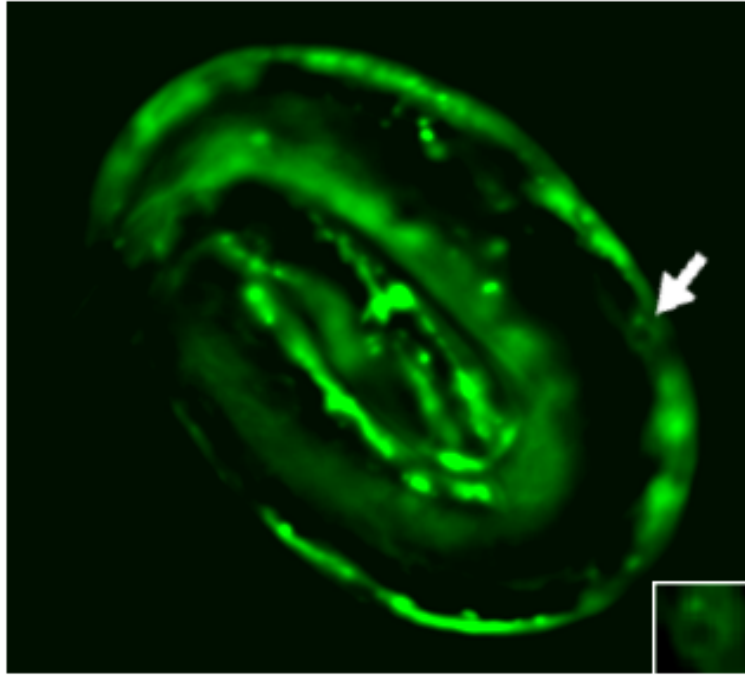

DIC

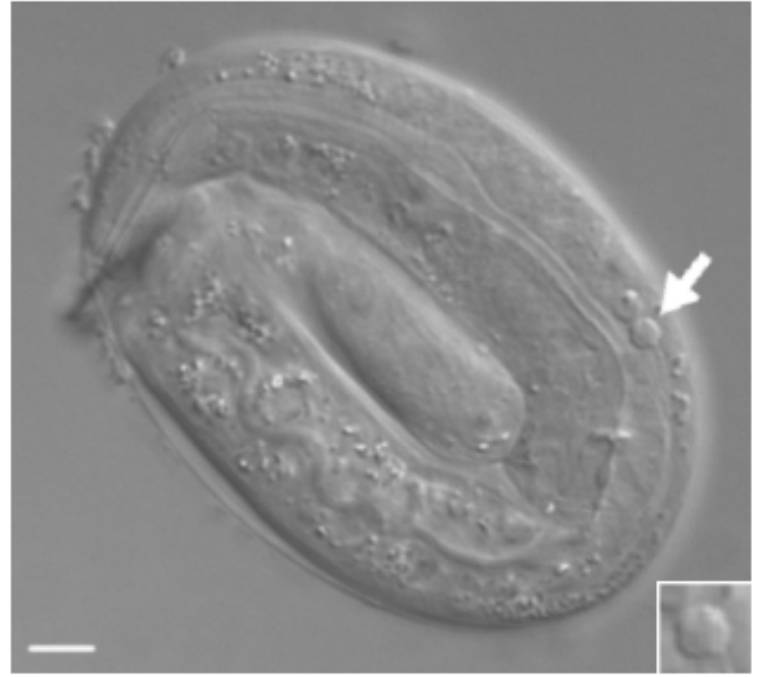

Supplement: pgen.1002663.s003.pdf [file pgen.1002663.s003.pdf]
